# Supplementary material for: Comparative evaluations on phenolic antioxidants of nine adulterants and anti-inflammation of four alternatives with their original herb Erycibe schmidtii
Source: Royal Society of Chemistry journal article supplement (doi:10.1039/c7ra10767f), 2017-01-01
Supplement: c7ra10767f1.pdf [file c7ra10767f1.pdf]

Supplementary Table S1 Correlation analysis among total phenols, flavonoids and tannins, three antioxidant capacities, and three marker compounds in *E. schmidtii* and its nine adulterants.

|         | TP      | TF      | TT      | DPPH    | ABTS    | ORAC    | S-lin  | CA    | S-letin |
|---------|---------|---------|---------|---------|---------|---------|--------|-------|---------|
| TP      | 1       |         |         |         |         |         |        |       |         |
| TF      | 0.766** | 1       |         |         |         |         |        |       |         |
| TT      | 0.968** | 0.668*  | 1       |         |         |         |        |       |         |
| DPPH    | 0.960** | 0.660*  | 0.968** | 1       |         |         |        |       |         |
| ABTS    | 0.874** | 0.876** | 0.750*  | 0.751*  | 1       |         |        |       |         |
| ORAC    | 0.925** | 0.714*  | 0.962** | 0.955** | 0.689*  | 1       |        |       |         |
| S-lin   | 0.842** | 0.903** | 0.790** | 0.791** | 0.834** | 0.837** | 1      |       |         |
| CA      | 0.680*  | 0.464   | 0.540   | 0.662*  | 0.755*  | 0.440   | 0.471  | 1     |         |
| S-letin | 0.560   | 0.698*  | 0.570   | 0.625   | 0.459   | 0.744*  | 0.655* | 0.171 | 1       |

\*Significant correlation at  $P < 0.05$ ; \*\* Extremely significant correlation at  $P < 0.01$ .

TP: total phenols; TF: total flavonoids; TT: total tannins.

S-lin: scopolin; CA: chlorogenic acid; S-letin: scopoletin

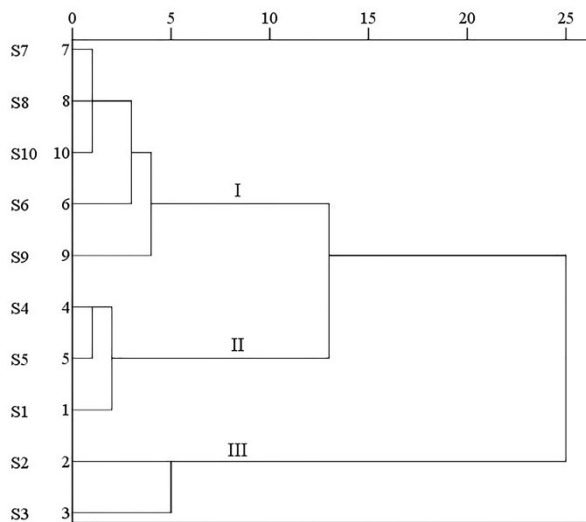

Supplementary Fig. S1 Dendrogram showing the hierarchical clustering results for the data shown in Fig 1 and Table 2, resulting from average linkage (Ward method) and squared euclidean distance.
